1       **Genetic mapping of some key plant architecture traits in *Brassica juncea***  
2               **using a cross between two distinct lines – vegetable type Tumida and**  
3                               **oleiferous Varuna**

4 Shikha Mathur<sup>1</sup>, Priyansha Singh<sup>2</sup>, Satish Kumar Yadava<sup>2</sup>, Vibha Gupta<sup>2</sup>, Akshay K.  
5 Pradhan<sup>2</sup>, Deepak Pental<sup>2\*</sup>

6 <sup>1</sup>Department of Genetics, University of Delhi South Campus, New Delhi-110021, India

7 <sup>2</sup>Centre for Genetic Manipulation of Crop Plants, University of Delhi South Campus, New  
8 Delhi-110021, India

9 \*Corresponding author

10 Email: [dpental@gmail.com](mailto:dpental@gmail.com)

11 Telephone: 91-011-24112609

12 ORCID ID: 0000-0002-6755-9947

13 **Abstract**

14 *Brassica juncea* (AABB, 2n=36), commonly called mustard is an allopolyploid crop of recent  
15 origin but has considerable morphological and underlying genetic variation. An F<sub>1</sub>-derived  
16 doubled haploid (F<sub>1</sub>DH) population developed from a cross between a Indian oleiferous line,  
17 Varuna, and a Chinese stem type vegetable mustard, Tumida showed significant variability  
18 for some key plant architectural traits, including four stem strength-related traits, stem  
19 diameter, plant height, branch initiation height, number of primary branches (*Pbr*), and days  
20 to flowering (*Df*). Multi-environment QTL analysis identified twenty environmentally stable  
21 QTL for the nine plant architectural traits. Both Tumida and Varuna contain some positive  
22 QTL that can be used to breed superior ideotypes in mustard. A QTL cluster on LG A10  
23 contained environmentally stable QTL for seven architectural traits. This region also  
24 contained overlapping environmentally stable major QTL (phenotypic variance ≥ 10%) for  
25 *Df* and *Pbr*, with Tumida contributing the trait enhancing alleles for both the traits. Since  
26 early flowering is critical for the cultivation of mustard in the Indian subcontinent, this QTL  
27 cannot be used for the improvement of *Pbr* in the Indian gene pool lines. Conditional QTL  
28 analysis for *Pbr* identified the QTL for improvement of *Pbr* without negative effects on *Df*.  
29 The environmentally stable QTL were projected on the genome assemblies of Tumida and  
30 Varuna for the identification of candidate genes. These findings provide insights into the  
31 genetics of plant architectural traits in two diverse gene pools of *B. juncea* and provide

32 opportunities for improvement of the plant architecture through marker-assisted  
33 introgressions.

34 **Key Words**

35 *Brassica juncea*, plant architecture, ideotype, lodging, stem strength, shoot branching,  
36 flowering time

37 **Key Message**

38 Genetic mapping of some key plant architectural traits in a vegetable type and an oleiferous  
39 *B. juncea* cross revealed environmentally stable QTL and candidate genes for breeding more  
40 productive ideotypes.

## 41 INTRODUCTION

42 *Brassica juncea* (L.) Czern & Coss (AABB, 2n=36) is a major oilseed crop of the Indian  
43 subcontinent cultivated in more than six million hectares of land in India alone (Jat et al.  
44 2019). The crop is well-adapted for cultivation in dryland areas but requires genetic  
45 improvement for higher yield and resistance to pests. The yield increase in a crop, either by  
46 varietal or hybrid development or through yield protection, depends upon the genetic  
47 variability available within the crop species. We earlier showed the presence of two distinct  
48 gene pools amongst the oleiferous types of *B. juncea* – the Indian gene pool and the east  
49 European gene pool; this identification was based on the differences in morphological and  
50 reproductive traits (Pradhan et al. 1993), and on a molecular marker-based diversity analysis  
51 (Srivastava et al. 2001). The Indian and the east European germplasm lines have been  
52 extensively used for genetic mapping of many traits of high agronomic value like disease  
53 resistance (Panjabi-Massand et al. 2010; Arora et al. 2019), oil content (Rout et al. 2018),  
54 yellow seed coat color (Padmaja et al. 2014), seed size (Dhaka et al. 2017) and several other  
55 yield influencing traits (Ramchiary et al. 2007; Yadava et al. 2012). The hybrids between the  
56 Indian and the east European gene pool lines of *B. juncea* were found to be heterotic for yield  
57 (Pradhan et al. 1993).

58 Although, *B. juncea* is a recent allopolyploid – extensive diversity has been reported within  
59 its primary gene pool. A recent genome sequencing of 480 lines of *B. juncea* has revealed six  
60 distinct genetic groups within the primary gene pool of the species (Kang et al. 2021). Two of  
61 these genetic groups, G2 and G6 have been earlier described as the east European gene pool  
62 (G2) and the Indian gene pool (G6) (Srivastava et al. 2001). Four additional distinct genetic  
63 groups (G1, G3, G4, and G5) have also been identified amongst the *B. juncea* lines under  
64 cultivation predominantly in east Asia. We will refer to the genetic groups as gene pools  
65 because these groups have undergone differential selection pressure due to their geographical  
66 location and end-use; however, they are a part of the primary gene pool of *B. juncea*. A *B.*  
67 *juncea* vegetable type stem mustard line Tumida (G5) was the first *B. juncea* genotype to be  
68 sequenced (Yang et al. 2016). We recently reported a highly contiguous genome assembly of  
69 an oleiferous type of *B. juncea* variety Varuna belonging to the Indian gene pool (G6)  
70 (Paritosh et al. 2021). Tumida types are distinct from lines of the Indian oleiferous gene pool  
71 like Varuna for plant architecture and yield influencing reproductive traits. The most distinct  
72 feature of the Indian gene pool lines (G6) is that they do not have any photoperiod sensitivity  
73 or vernalization requirements for flowering unlike the lines of other gene pools (G1-G5). The

74 Indian gene pool lines are grown during a short winter period in the northern plains of India  
75 whereas, the other gene pool lines are grown during the summer season under long day-  
76 length conditions and therefore, are ill-adapted to the growing conditions in the Indian  
77 subcontinent.

78 Modification of plant architecture has been shown to contribute to the improvement of yield  
79 and/or stress resistance in several crops (Guo et al. 2020). As an example, the mustard  
80 hybrids developed by our group have a significantly large number of primary and secondary  
81 branches and high pod density (Sodhi et al. 2006; Aakanksha et al. 2021) but are tall and  
82 therefore, susceptible to breaking and lodging under high winds.

83 An F<sub>1</sub>DH (F<sub>1</sub>-derived doubled haploid) population developed from a cross between Tumida  
84 and Varuna (hereinafter referred to as the “TUV” population), showed striking variability for  
85 several plant architectural traits. We report here the mapping of some crucial plant  
86 architectural traits – stem strength and diameter, plant height, branch initiation height,  
87 number of primary branches, and days to flowering which would be useful in developing  
88 lines with improved lodging resistance, reduced plant height, branch initiation height, and  
89 days to flowering and higher number of primary branches. The results clearly show that  
90 exotic germplasm, like Tumida, seemingly ill-adapted to the Indian growing conditions, can  
91 contribute some significant QTL to improve lines of the Indian and other gene pools of *B.*  
92 *juncea* for some important architectural traits.

## 93 **MATERIALS AND METHODS**

### 94 **Plant materials, field experiments, and phenotypic evaluation**

95 *B. juncea* line Tumida was crossed with line Varuna, and F<sub>1</sub> plants were used for developing  
96 DH lines by microspore culture following an earlier described protocol (Mukhopadhyay et al.  
97 2007). Both the lines – Tumida and Varuna had been maintained by strict selfing. For  
98 phenotyping, the parents, F<sub>1</sub>, and the 169 F<sub>1</sub>DH lines were grown in four independent trials  
99 (T1, T2, T3, and T4) at the University of Delhi research farm station in Bawana, Delhi, India  
100 during the crop growing seasons of 2018-19 (T1), 2019-20 (T2) and 2020-21 (T3 and T4 –  
101 staggered sowing). The TUV population was sown in a randomized complete block design  
102 with three replications in each trial. Each line was planted in a single 2 m row with a 45 cm  
103 distance between two adjacent rows; the sowing density was ~20 plants per row. More details  
104 on the field trials are provided in Table S1.

105 Phenotyping was carried out for several traits which included, stem strength-related traits,  
106 stem diameter (*Dia*), branch initiation height (*Bih*), plant height (*Plht*), number of primary  
107 branches (*Pbr*), and days to flowering (*Df*). For *Bih*, *Plht*, and *Pbr*, data was taken from three  
108 competitive plants from each replication and the mean of the observations was used as the  
109 trait value. *Bih* was measured as the length from the base of the plant to the point from where  
110 the first primary branch arises. *Df* was recorded when about 50% of the plants in a row had at  
111 least one flower open. For measurements of stem strength-related traits and stem diameter  
112 (*Dia*), the stem tissues were sampled at the stage when seed filling ended but pods were still  
113 green, and the stem bore maximum weight (hereinafter referred to as the “mature green  
114 stage”). A total of ten competitive plants from each replication were sampled and the mean of  
115 the observations was used as the trait value. The measurements for these traits were taken at  
116 the mid-point of the last internode immediately below the inflorescence (hereinafter referred  
117 to as the “test-point”). *Dia* was measured using the digital vernier calipers (Model No. 1108-  
118 150, INSIZE Co. Ltd., India). In the case of the stem strength-related traits – bend force (*Bf*)  
119 was measured using a three-point bending test, stab force (*Sf*) was measured using a pinhead  
120 to penetrate the stem epidermal layers and vasculature, and press force (*Pf*) was measured  
121 using a flat-head to press the stem at the test-point. All stem strength-related traits (*Bf*, *Sf*, and  
122 *Pf*) were measured with a YYD-1 instrument (Zhejiang Top Cloud-Agri Technology Co.  
123 Ltd., Hangzhou, China). Stem breaking strength (*Bs*) was calculated as described by Wei et  
124 al. (2017).

125 The Best Linear Unbiased Prediction (BLUP) for each TUV line across the three  
126 environments was computed for each of the nine traits using the R package ‘metan’ (Olivoto  
127 and Lúcio 2020) with a mixed linear model that accounts for the effects of the environment,  
128 replication, genotype, and genotype by environment. The average trait values obtained in  
129 each trial – single environment (SE) values and BLUPs were subjected to correlation  
130 statistical analyses using Plabstat (Utz 2001). The broad-sense heritability ( $H_B$ ) for each trait  
131 was computed using the phenotyping module of iMAS (Integrated Marker Assisted  
132 Selection) version 2.1 (Sirisha et al. 2005) using the average trait values obtained in each  
133 field trial.

### 134 **Genetic mapping, QTL analysis, and identification of the candidate genes**

135 The 169 TUV lines were used for the construction of a genetic map using GBS (genotyping  
136 by sequencing) based SNP markers that have been described earlier (Paritosh et al. 2021).  
137 The genetic map was developed using the ‘mstmap’ function of the ASMap package in R

138 (Taylor and Butler 2017) using the parameters – distance function Kosambi, cut-off  $p$  value  
139  $1e-15$ , and a missing threshold of 0.3.

140 QTL mapping was carried out with the SE trait values and BLUPs using the composite  
141 interval mapping (CIM) module of Windows QTL Cartographer 2.5 (Wang 2007). For CIM,  
142 the standard model (Model 6) was used with forward regression, a window size of 10 cM,  
143 and five background control markers. The genome was scanned for putative QTL with main  
144 effects at a walking speed of 1 cM. The experiment-wise error rate was determined by  
145 performing 1000 permutations to obtain the empirical thresholds (Churchill and Doerge  
146 1994). A LOD threshold of 3.0 was used for identifying significant QTL. A QTL with LOD  
147 values ranging between 2.5 and 3 was considered a suggestive QTL. QTL detected with  
148 phenotypic variance ( $R^2$ )  $\geq 10\%$  was considered a major QTL.

149 The QTL were named using an abbreviation of the trait beginning with a capital letter  
150 followed by the name of the linkage group (LG) and the serial number of chronological QTL  
151 for the trait detected on the LG independently in each analysis. The QTL detected using SE  
152 trait values were superscripted with the abbreviation for the trial (T1, T2, T3, and T4) in  
153 which these were detected. The QTL detected using BLUPs were superscripted with the letter  
154 'B'. The QTL identified for a trait in different analyses with overlapping confidence intervals  
155 were assumed to be the same QTL. A QTL that could be detected in at least two single  
156 environments (SEs) and also using BLUPs was regarded as a "Stable QTL" as described  
157 earlier (Xu et al. 2022). The Stable QTL was prefixed with 'S-' and the confidence interval of  
158 the QTL detected using BLUPs was used as the confidence interval for the Stable QTL.

159 Epistatic QTL were detected using QTL Network 2.0 (Yang et al. 2007). The program  
160 simultaneously detects the additive QTL, QTL  $\times$  environment (QE), epistasis, and epistasis  $\times$   
161 environment interactions using multi-environment trait data. The additive QTL detected  
162 using QTL Network 2.0 were suffixed with '.QN'. The analyses were carried out using  
163 mixed-model-based composite interval mapping (MCIM) with 1 cM walk speed and a testing  
164 window of 10 cM. Thresholds for the presence of QTL were generated by performing 1000  
165 permutations. The epistatic effects among loci with or without individual additive main  
166 effects were detected by performing 2D genome scans. The digenic interactions (additive  $\times$   
167 additive) studied included interactions between two main-effect QTL (Type I interaction),  
168 between a main effect QTL and a QTL without any significant main effect (Type II  
169 interaction), and between two QTL without any significant main effect (Type III interaction)  
170 (Li et al. 2001).

171 Conditional QTL mapping was carried out using the software QGA Station 2.0  
172 (<http://ibi.zju.edu.cn/software/qga/v2.0/index.htm>; Zhu 1995). QTL mapping for conditional  
173 values was performed using Windows QTL Cartographer 2.5 as described above and the  
174 identified QTL were defined as conditional QTL superscripted with the letter ‘C’.

175 The GBS markers flanking the QTL regions were mapped on the genome assemblies of *B.*  
176 *juncea* lines Varuna (Paritosh et al. 2021) and Tumida (Yang et al. 2016) using blastn, *e*  
177 value 1e-25, >95% identity, and 100% coverage. The sequence tags for the GBS markers  
178 used in the study have been provided earlier (Paritosh et al. 2021). The genes between the  
179 flanking markers and the annotations of Tumida-specific genes were based on the revised  
180 assembly of the Tumida genome (V2.0) available in the *Brassica* database  
181 (<http://brassicadb.cn/#/>; Chen et al. 2022). The GO annotations and functional classification  
182 of Varuna genes were obtained using the Blast2GO program  
183 (<https://www.biobam.com/omicsbox>; Conesa et al. 2005).

#### 184 **Stem anatomy**

185 The anatomy of the stem tissues was studied at the mature green stage. Transverse free-hand  
186 sections obtained at the test point from three different individuals were analyzed for each  
187 TUV line. A Leica TCS SP8 AOBS confocal laser scanning microscope (Leica Microsystems  
188 Mannheim, Germany) was used to examine the sections for lignin autofluorescence and  
189 collection of Differential Interference Contrast (DIC) images. The sections were mounted in  
190 50% (v/v) glycerol for visualization of total lignin autofluorescence (excitation at 405 nm and  
191 emission detected at 440-510 nm). The laser intensity, pinhole, and photomultiplier gain  
192 settings were kept constant between samples to obtain meaningful comparisons.

## 193 **RESULTS**

### 194 **Construction of the TUV linkage map**

195 A linkage map of TUV F<sub>1</sub>DH lines using 9041 polymorphic genetic markers has been  
196 described earlier (Paritosh et al. 2021). In the present study, a subset of 2028 polymorphic  
197 GBS-based SNP markers was identified from the earlier TUV genetic map by removing the  
198 excess markers mapping to the same positions. These 2028 markers were used for developing  
199 a new linkage map using 169 individuals of the TUV population. The genetic map is 3512.8  
200 cM in length with an average of 113 markers per linkage group at an average spacing of 1.73  
201 cM between two consecutive markers. Information on the distribution, density, and positions  
202 of the markers on the TUV linkage map is provided in Tables S2 and S3.



## 203 **Phenotypic evaluation of the parents, F<sub>1</sub>, and the TUV population**

204 The mean trait values of the parental lines, F<sub>1</sub>, and the range and mean trait values of the DH  
205 lines for the nine plant architectural traits namely, press force (*Pf*), bend force (*Bf*), stab force  
206 (*Sf*), breaking strength (*Bs*), stem diameter (*Dia*), plant height (*Plht*), branch initiation height  
207 (*Bih*), number of primary branches (*Pbr*), and days to flowering (*Df*) are listed in Table 1 and  
208 Table S4. The BLUPs of the TUV DH lines are provided in Table S5. Varuna showed higher  
209 trait values for the stem strength-related traits (*Pf*, *Sf*, *Bf*, and *Bs*), *Dia*, *Bih*, and *Plht* whereas  
210 Tumida showed higher trait values for *Pbr* and *Df* (Fig. 1 and Table 1). The low trait values  
211 for *Plht*, *Bih*, and *Df* are desirable from the breeding perspective; therefore, Tumida is the  
212 better parent for *Plht* and *Bih*, and Varuna is the better parent for *Df*. For most of the traits,  
213 the F<sub>1</sub> showed intermediate values with the exceptions of *Dia*, *Plht*, and *Bih* (Fig. S1 and  
214 Table 1). The TUV mapping population showed transgressive segregation, suggesting that  
215 both Varuna and Tumida contained positive alleles for all the nine architectural traits (Fig. S1  
216 and Table 1). However, very few transgressive segregants were observed for *Df* with a  
217 flowering time less than that of Varuna (Table 1 and Table S5). Extensive transgressive  
218 segregation was observed for the *Bih* trait with values ranging from 17.05-143.09 cm (Fig. S1  
219 and Table 1).

220 The broad sense heritability (H<sub>B</sub>) of the nine plant architectural traits ranged from 33 to 98%  
221 in the three environments (Table S4). The stem strength-related traits were found to be  
222 moderately heritable with H<sub>B</sub> of *Pf*, *Sf*, *Bf*, and *Bs* ranging from 33-36%, 45-60%, 48-62%,  
223 and 42-62%, respectively (Table S4). *Dia* and *Plht* also showed moderate heritability of 48-  
224 62% and 53-89%, respectively. *Bih* (H<sub>B</sub> 79-88%), *Pbr* (H<sub>B</sub> 81-90%), and *Df* (H<sub>B</sub> 94-98%)  
225 were found to be highly heritable traits.

226 We also undertook an anatomical analysis of the stems of Tumida, Varuna, and some TUV  
227 population lines (TUV-547, TUV-780, TUV-95, and TUV-25) showing transgressive  
228 segregation for most of the stem strength-related traits (Fig. 2 and Fig. S2). The transverse  
229 sections of stems of parents at the test-point revealed more lignified interfascicular  
230 sclerenchyma tissue in Varuna as compared to Tumida (Fig. 2 and Fig. S2), suggesting  
231 differential cambial activity in Tumida and Varuna. Similar differences were also observed in  
232 the TUV lines that showed contrasting values for the stem strength-related traits (Fig. S2).

## 233 **Correlation analysis of the plant architectural traits**



234 The Pearson correlation coefficients among the nine quantitative traits were estimated using  
235 BLUPs (Table 2). The four stem strength-related traits (*Pf*, *Sf*, *Bf*, and *Bs*) showed a  
236 significantly ( $p \leq 0.01$ ) high positive correlation with one another. *Dia* showed a significant  
237 ( $p \leq 0.01$ ) positive correlation with *Bf* and *Pf* whereas, it was not highly correlated with *Bs*  
238 and *Sf*. *Bih* and *Plht* were positively correlated with one another. *Df* showed a significant ( $p \leq$   
239 0.01) negative correlation with *Pf*, *Sf*, *Bf*, and *Dia* and a positive correlation with *Plht* and  
240 *Bih*. *Pbr* showed a significant ( $p \leq 0.01$ ) positive correlation with *Df* ( $r = 0.737$ ) and *Plht* ( $r =$   
241 0.668) which might negatively affect the simultaneous improvement of these traits.

## 242 **QTL Mapping**

243 The QTL for each trait were detected using Windows QTL Cartographer 2.5 using the mean  
244 trait values obtained in each trial (SE trait values) (Table S6) and using the BLUPs (Table  
245 S7). A QTL that could be detected in at least two single environments (SEs) and also detected  
246 using BLUPs, was designated a Stable QTL. QTL mapping was also carried out using QTL  
247 Network 2.0, which allowed the detection of QTL  $\times$  environment (QE), epistasis, and  
248 epistasis  $\times$  environment interactions in addition to the detection of additive QTL (Tables S8  
249 and S9). An additive QTL detected for a trait by both Windows QTL Cartographer 2.5 and  
250 QTL Network 2.0 with overlapping confidence intervals was considered to be the same QTL  
251 (Table S8). For every trait, we first describe the QTL mapped using Windows QTL  
252 Cartographer 2.5, followed by an analysis with QTL Network 2.0.

### 253 Stem strength-related traits (*Pf*, *Sf*, *Bf*, and *Bs*)

254 A total of 13, 18, 15, and 12 QTL were detected using SE trait values for *Pf*, *Sf*, *Bf*, and *Bs*,  
255 respectively in the three trials (Table S6). Using BLUPs, four QTL each for *Pf*, *Bf*, and *Bs*  
256 and three QTL for *Sf* were detected (Table S7). Several QTL for *Pf*, *Sf*, *Bf*, and *Bs* mapped to  
257 overlapping intervals, particularly, on linkage groups (LGs) A10 and B07. This observation  
258 parallels the significantly high positive correlations predicted between these traits. A total of  
259 seven Stable QTL were identified for stem strength-related traits (*Pf*, *Sf*, and *Bf*) on LGs A07,  
260 A09, A10, B06, and B07 (Fig. 4, Table 3, and Table S10). Varuna contributed beneficial  
261 alleles for the major Stable QTL for *Pf* (*S-Pf-A10-1*) and *Bf* (*S-Bf-A10-1*) in overlapping  
262 confidence intervals on LG A10. These QTL explain 23% and 19.5% of the phenotypic  
263 variances, respectively. A Stable QTL *S-Pf-B07-1*, explaining 7.1% of the phenotypic  
264 variance was contributed by Tumida. We detected three Stable *Sf* QTL – *S-Sf-A09-1*, *S-Sf-*

265 *A10-1*, and *S-Sf-B06-1* with Varuna contributing positive alleles for the trait (Fig. 4, Table 3,  
266 and Table S10). No Stable QTL was detected for *Bs* using the adopted criteria.

267 A total of 8, 6, 5, and 3 QTL were mapped using QTL Network 2.0 for *Bf*, *Sf*, *Pf*, and *Bs*,  
268 respectively (Table S8). QTL same as the seven Stable QTL for stem strength-related traits  
269 were also detected using QTL Network 2.0 (Table S8). Significant ( $p \leq 0.05$ ) QTL  $\times$   
270 environment (QE) interactions were detected for the QTL *Bf* (*Bf-A10-1.QN*), *Pf* (*Pf-A10-*  
271 *I.QN*), and *Bs* (*Bs-A10-1.QN*) on the LG A10 (Table S8), which is consistent with the  
272 moderate heritability observed for these traits. The *Pf-A10-1.QN* and *Bf-A10-1.QN* QTL were  
273 found to be the same as the Stable QTL – *S-Pf-A10-1* and *S-Bf-A10-1*, respectively. The  
274 phenotypic variance explained by the QE interaction was low for *Pf-A10-1.QN* QTL (1.55%  
275 compared to 16.81% of the additive QTL) (Table S8). On the other hand, the phenotypic  
276 variance explained by the QE interaction for *Bf-A10-1.QN* was 6.40% compared to 13.85% of  
277 the additive QTL suggesting that this QTL might have variable  $R^2$  in different environments  
278 which should be taken into consideration while introgressing this QTL. The QTL detected for  
279 *Bf*, *Bf-A03-1.QN* showed a Type II digenic interaction with a locus on LG A01 without  
280 significant main effect. However, *Bf-A03-1.QN* QTL was not a Stable QTL for *Bf*. We did  
281 not detect any significant Type I and Type II digenic interactions among the QTL detected  
282 for *Sf*, *Pf*, and *Bs*.

### 283 Stem Diameter (*Dia*)

284 We identified 17 QTL for *Dia* in the TUV population using the SE trait values (Table S6), 11  
285 of which showed positive additive effects, indicating that Tumida contributed the alleles for  
286 larger diameter, whereas six QTL were contributed by Varuna. Using BLUPs, five QTL for  
287 *Dia* were detected (Table S7). According to the adopted criteria, three QTL – one each on  
288 LGs A07, A10, and B07 were designated Stable QTL for *Dia* (Fig. 4, Table 3, and Table  
289 S10). Varuna contributed the positive allele for the major Stable QTL *S-Dia-A10-1* on LG  
290 A10 explaining 14.4% of the phenotypic variance. Tumida contributed the beneficial alleles  
291 for the Stable *Dia* QTL – *S-Dia-A07-1* and *S-Dia-B07-1* which explained 5.5% and 4.8% of  
292 the phenotypic variances, respectively.

293 Using QTL Network 2.0, a total of seven QTL were mapped for *Dia*, including the QTL that  
294 were the same as the three Stable QTL (Table S8). We detected significant ( $p \leq 0.05$ ) QE  
295 interactions for the *Dia-A10-1.QN* QTL on LG A10 which is the same as the Stable QTL *S-*  
296 *Dia-A10-1*. However, the phenotypic variance explained by the interaction was extremely

297 low (Table S8) and does not have major implications for breeding efforts directed at the  
298 improvement of this trait. We did not detect any epistasis (Type I and Type II) and epistasis  $\times$   
299 environment interactions for the QTL detected for *Dia*.

### 300 Plant height (*Plht*)

301 For *Plht*, a total of 15 QTL were mapped in the TUV population using the SE trait values  
302 (Table S6). For ten of the SE QTL, Tumida contributed the alleles for higher *Plht*, which is  
303 interesting since Varuna is the better parent for *Plht*. Using BLUPs, we detected six QTL for  
304 *Plht* (Table S7). Using the adopted criteria, one QTL each on LG A06 (*S-Plht-A06-1*) and  
305 A10 (*S-Plht-A10-1*) were detected as the Stable QTL (Fig. 4, Table 3, and Table S10). The *S-*  
306 *Plht-A06-1* and *S-Plht-A10-1* QTL explained 6.3% and 11.3% of the phenotypic variances,  
307 respectively. The allele for shorter plant height for the QTL *S-Plht-A06-1* was contributed by  
308 Tumida, and for the QTL *S-Plht-A10-1* was contributed by Varuna.

309 A total of seven QTL were mapped for *Plht* using QTL Network 2.0 (Table S8); five of these  
310 QTL were also detected by Windows QTL Cartographer 2.5. One QTL each on LGs B03  
311 (*Plht-B03-1.QN*) and B06 (*Plht-B06-1.QN*) were detected only by QTL Network 2.0. The  
312 beneficial allele in *Plht-B06-1.QN* was contributed by Tumida and therefore, it could be  
313 useful for decreasing the plant height of the Indian gene pool lines. We did not detect any QE  
314 interactions for the *Plht* QTL. Further analysis was carried out for epistasis and epistasis  $\times$   
315 environment interactions for the QTL detected for *Plht*. The QTL on LG A10 (*Plht-A10-*  
316 *1.QN*) exhibited Type I digenic interaction with the QTL on LG A03 (*Plht-A03-1.QN*) with  
317 additive  $\times$  additive effect = -3.67 suggesting that *Plht* is decreased by the association of  
318 Varuna alleles at these loci (Table S9). The *Plht-A10-1.QN* QTL was found to be the same as  
319 the Stable QTL *S-Plht-A10-1*. Since the interaction of *Plht-A03-1.QN* and *Plht-A10-1.QN*  
320 further decreases the *Plht*, these loci need to be introgressed together.

### 321 Shoot branching-related traits (*Bih* and *Pbr*)

322 For branch initiation height (*Bih*), a total of 19 QTL were mapped in the TUV population  
323 using the SE trait values. Out of these, Tumida contributed 10 QTL for high *Bih* (Table S6).  
324 We detected four QTL for *Bih* using BLUPs (Table S7). Using the adopted criteria, a major  
325 QTL each on LG A03 (*S-Bih-A03-1*), A06 (*S-Bih-A06-1*), and A10 (*S-Bih-A10-1*) accounting  
326 for 24%, 10.4% and 21.4% of the phenotypic variances, respectively was designated as  
327 Stable QTL (Fig. 4, Table 3, and Table S10). Tumida contributed beneficial allele for low *Bih*

328 in the *S-Bih-A06-1* QTL; therefore, this QTL would be important for improving the trait in  
329 the Indian gene pool lines of *B. juncea*.

330 A total of nine QTL were mapped for *Bih* using QTL Network 2.0 (Table S8). QTL same as  
331 seven of these QTL were also detected by Windows QTL Cartographer 2.5, which included  
332 the three Stable QTL for *Bih* on LGs A03, A06, and A10. *Bih-A04-1.QN* and *Bih-A09-1.QN*  
333 QTL with alleles for higher *Bih* contributed by Tumida were detected by QTL Network 2.0  
334 only. None of the QTL detected for *Bih* showed QE and/or digenic interactions.

335 For the number of primary branches (*Pbr*), 16 QTL were mapped in the TUV population  
336 using SE trait values, for which both the parents, Varuna and Tumida contributed positive  
337 alleles for an increase in the number of primary branches (Table S6). We detected seven QTL  
338 for *Pbr* using BLUPs (Table S7). Stable QTL one each on LG A10 (*S-Pbr-A10-1*), B06 (*S-*  
339 *Pbr-B06-1*), and B07 (*S-Pbr-B07-1*) were detected for *Pbr* explaining 18.8%, 4.4%, and 5.9%  
340 of the phenotypic variances, respectively (Fig. 4, Table 3, and Table S10). Tumida  
341 contributed positive allele for a higher number of primary branches for the *S-Pbr-A10-1* QTL.  
342 Using QTL Network 2.0, a total of eight QTL were mapped for *Pbr* (Table S8). QTL same as  
343 all these QTL were also detected by Windows QTL Cartographer 2.5. The QTL controlling  
344 *Pbr* did not exhibit any QE and/or digenic (Type I and Type II) interactions.

#### 345 Days to flowering (*Df*)

346 We identified 12 QTL for *Df* in the TUV population in the three trials (Table S6). Ten of  
347 these QTL were contributed by Tumida whereas two QTL were contributed by Varuna,  
348 indicating that both the parents contributed the alleles for early flowering. Using BLUPs, we  
349 detected seven QTL for *Df* (Table S7). Two QTL, one each on LG A03 (*S-Df-A03-1*) and  
350 A10 (*S-Df-A10-1*) explaining 15.3% and 40% of the phenotypic variances, respectively were  
351 designated as Stable QTL for *Df* (Fig. 4, Table 3, and Table S10); Varuna contributed the  
352 early flowering alleles in both the QTL. We detected two significant QTL each in one  
353 environment (*Df-A06-1<sup>T2</sup>* and *Df-A06-2<sup>T2</sup>*) and BLUP analysis (*Df-A06-1<sup>B</sup>* and *Df-A06-2<sup>B</sup>*),  
354 with Tumida contributing the early flowering alleles (Tables S6 and S7) which could explain  
355 the presence of transgressive segregants with *Df* less than Varuna in the TUV mapping  
356 population.

357 A total of six QTL were mapped for *Df* using QTL Network 2.0 (Table S8). QTL same as all  
358 of these QTL were also detected by Windows QTL Cartographer 2.5. We detected  
359 statistically significant ( $p \leq 0.05$ ) QE interactions for the *Df* QTL *Df-A10-1.QN*, which was

360 found to be the same as the Stable QTL *S-Df-A10-1* on LG A10. The phenotypic variance  
361 explained by the *Df-A10-1.QN* QTL was 40.64% however, the phenotypic variance explained  
362 by the interaction was extremely low (1.02%) so it is inconsequential for breeding  
363 applications (Table S8). The QTL for *Df* on LG A03, *Df-A03-1.QN* (same as *S-Df-A03-1*)  
364 exhibited a Type I digenic interaction with *Df-A10-1.QN* (same as *S-Df-A10-1*) with additive  
365  $\times$  additive effect = -4.82 suggesting that *Df* is decreased by the association of Varuna alleles  
366 at both the loci (Table S9).

### 367 **Analysis of QTL clusters and conditional QTL mapping**

368 A QTL cluster in the interval spanning 43.1-65.8 cM on LG A10 contained a Stable QTL for  
369 seven of the nine plant architectural traits mapped in the study (Fig 3 and Table S10). We  
370 detected Stable QTL with overlapping confidence intervals for *Plht* (*S-Plht-A10-1*), *Dia* (*S-*  
371 *Dia-A10-1*), and *Bih* (*S-Bih-A10-1*) in this cluster with Varuna contributing the allele for  
372 increasing *Dia* and decreasing *Plht* and *Bih* (Table S10). Stable QTL for stem strength-related  
373 traits, *Bf* (*S-Bf-A10-1*) and *Pf* (*S-Pf-A10-1*), with trait enhancing allele contributed by Varuna  
374 and for *Df* (*S-Df-A10-1*) and *Pbr* (*S-Pbr-A10-1*) with trait enhancing allele contributed by  
375 Tumida were also detected in the same region.

376 An overlap was observed in the *Pf*, *Bf*, and *Dia* QTL on LGs A07, A10, and B07 (Fig. 4,  
377 Table S6, and Table S7); however, it is not of major implication for stem strength  
378 improvement since the positive alleles for these traits (desirable for the improvement of stem  
379 strength) were contributed by Varuna in the colocalized QTL on LG A10 and by Tumida in  
380 the colocalized QTL on LGs A07 and B07. Similarly, the Stable QTL for *Bih* colocalized  
381 with the QTL for *Df* on LGs A03, A06, and A10 (Tables S6, S7, and S10). However, since  
382 the alleles for lower trait values were contributed by Tumida in the colocalized *Bih* and *Df*  
383 QTL on LG A06 and by Varuna in the colocalized *Bih* and *Df* QTL on LGs A03 and A10,  
384 these QTL regions can be used in breeding programs for simultaneous improvement of the  
385 two traits.

386 We observed an antagonistic overlap between the stable QTL for *Df* (*S-Df-A10-1*) and *Pbr*  
387 (*S-Pbr-A10-1*) on LG A10 where Varuna contributed the beneficial allele for early flowering  
388 and Tumida contributed the beneficial allele for a high number of primary branches.  
389 Similarly, the Stable QTL for *Df* on LG A03 (*S-Df-A03-1*) contributed by Tumida showed  
390 overlapping confidence intervals with a major *Pbr* QTL (*Pbr-A03-2<sup>B</sup>*) detected using BLUPs  
391 with Tumida contributing the trait enhancing alleles. These observations point toward the

392 high correlation observed between *Pbr* and *Df* (Table 2). The regression analysis of *Pbr* on  
393 *Df* (Fig. 3) revealed several TUV lines with low *Df* and high *Pbr* suggesting that these traits  
394 are not completely pleiotropic and the high positive correlation between these traits might  
395 also be due to the linkage of some of the loci controlling them.

396 To identify the *Pbr* QTL without the correlated effects on *Df* and to dissect the genetic basis  
397 of control of *Df* and *Pbr* QTL on LGs A10 and A03, conditional QTL were mapped for *Pbr*  
398 [*Pbr*|*Df*, *Pbr* conditional on *Df*] that are independently expressed from *Df* (Table 4). No QTL  
399 for *Pbr* was detected on LG A10 using conditional *Pbr* values, suggesting a pleiotropic  
400 control of *Df* and *Pbr* at the *S-Pbr-A10-1* locus. However, we detected a major conditional  
401 *Pbr* QTL *Pbr-A03-1<sup>C</sup>* which was found to be the same as *Pbr-A03-2<sup>B</sup>* on LG A03, suggesting  
402 that this QTL is independent of the variation in *Df*; but since *Pbr-A03-2<sup>B</sup>* QTL was detected  
403 in only one environment and BLUP analysis, it cannot be considered a Stable QTL for *Pbr*.  
404 Additionally, four conditional *Pbr* QTL were detected on LGs A07 (*Pbr-A07-1<sup>C</sup>*), B03 (*Pbr-*  
405 *B03-1<sup>C</sup>* and *Pbr-B03-2<sup>C</sup>*), and B06 (*Pbr-B06-1<sup>C</sup>*) (Table 4) which could be used to improve  
406 *Pbr* in breeding programs without negative effects on *Df*.

#### 407 **Physical intervals of the Stable QTL and identification of candidate genes**

408 Since the genomes of both Tumida (Yang et al. 2016) and Varuna (Paritosh et al. 2021) have  
409 been sequenced, we identified the physical intervals of the Stable QTL and the number of  
410 high confidence genes in these intervals in the Varuna and Tumida genome assemblies  
411 (Tables S10 and S11). For screening the QTL intervals for the identification of candidate  
412 genes, 18 out of the 20 Stable QTL with physical intervals less than 2.5 Mb were considered.  
413 The genes contained in the Stable QTL intervals and their GO annotations are provided in  
414 Table S11. The candidate genes for each of the nine plant architectural traits were identified  
415 using the information available in heterologous systems and evidence from the functional  
416 annotations of the genes contained in the Stable QTL intervals (Table S12).

417 As described earlier, the transverse sections of the stems of Varuna and Tumida showed  
418 differences in interfascicular sclerenchymatous tissue (Fig. 2 and Fig. S2) therefore, the genes  
419 reported to regulate vascular cambium development and differentiation were prioritized as  
420 major candidates for the regulation of stem strength in the TUV population. Additionally, the  
421 genes with GO terms associated with biosynthesis of lignin, cellulose, and xylan were  
422 considered candidate genes for the regulation of stem strength. In the three Stable QTL for  
423 stem diameter, a total of 50 genes primarily involved in the development of stem vascular



424 tissues, secondary cell wall biogenesis, cell growth, and auxin signaling were considered the  
425 candidate genes (Table S12).

426 Nine candidate genes were identified for the regulation of *Plht* in the Stable QTL *Plht-A10-1*  
427 on LG A10 (Table S12). Previous studies have highlighted the role of gibberellins, auxin, and  
428 brassinosteroids in the control of plant height (Wang and Li 2006; Wang et al. 2018; Guo et  
429 al. 2020). Therefore, the genes in the *Plht* QTL with GO terms associated with gibberellin,  
430 auxin, brassinosteroid, and strigolactone biosynthesis, transport, and signaling were also  
431 considered candidate genes for the regulation of *Plht*.

432 The outgrowth of axillary meristems into branches involves a complex interaction of sugars  
433 and plant hormones including auxins, cytokinins, and strigolactones; these have been well  
434 described in some reviews (Domagalska and Leyser 2011; Janssen et al. 2014; Wang et al.  
435 2018; Barbier et al. 2019). Genes in the stable *Pbr* and *Bih* QTL with GO terms associated  
436 with shoot development, sugar transport, and signaling of plant hormones, auxins, cytokinins,  
437 and strigolactones were therefore considered as candidate genes for these traits. A total of 34  
438 and 27 candidate genes were identified for *Bih* and *Pbr*, respectively (Table S12).

439 A total of 14 candidate genes for days to flowering (*Df*) were identified in the Stable QTL –  
440 *S-Df-A03-1* and *S-Df-A10-1* spanning 6.9 and 2.6 cM regions, respectively (Table S12). Out  
441 of these, 12 genes have been reported to control flowering time in literature (references listed  
442 in Table S12) and two genes have GO terms associated with the regulation of flowering time  
443 (GO:0048510, GO:2000028).

## 444 **DISCUSSION**

### 445 **QTL cluster on LG A10 is critical for adaptability of the Indian gene pool lines**

446 We detected a QTL cluster on LG A10 in the TUV population (Fig. 4) containing major loci  
447 for most of the plant architectural traits including, *Bih*, *Plht*, *Df*, *Bf*, *Pf*, *Dia*, and *Pbr*. This  
448 QTL cluster contains a major QTL *S-Df-A10-1* ( $R^2 = 40.9\%$ ) controlling *Df* with the early  
449 flowering allele contributed by Varuna. Early flowering is the most crucial trait for the  
450 cultivation of mustard in the Indian subcontinent. QTL mapping studies in the bi-parental  
451 populations resulting from crosses between the Indian and east European lines have also  
452 revealed QTL clusters on LG A10 with the beneficial alleles for several agronomically  
453 important traits, including the flowering time, contributed by the parent belonging to the  
454 Indian gene pool (Ramchiary et al. 2007; Yadava et al. 2012).



455 The Stable *Df* QTL *S-Df-A10-1* in the cluster on LG A10 showed significant ( $p \leq 0.05$ )  
456 digenic interaction with *S-Df-A03-1* QTL on LG A03 (Table S9). *S-Df-A03-1* and *S-Df-A10-1*  
457 contain *FT-INTERACTING PROTEIN 1 (FTIP1)* and *CONSTANS (CO)* as major candidate  
458 genes, respectively. *CO* is a regulator of *FT* mRNA transcription (Samach et al. 2000) and  
459 *FTIP1* regulates *FT* protein transport (Liu et al. 2012). Since these genes are part of a  
460 common pathway for regulation of the flowering time, this could explain the digenic  
461 interaction observed between these QTL in the present study.

462 The alleles for low *Bih*, *Plht*, and *Df* and high stem strength and *Dia* for the QTL in the  
463 cluster on LG A10 are contributed by Varuna whereas, Tumida contributes the beneficial  
464 alleles for a major locus – *S-Pbr-A10-1* controlling *Pbr* in the cluster (Fig. 4 and Table 3).  
465 The confidence interval of the *S-Pbr-A10-1* locus overlaps with the *Df* locus *S-Df-A10-1* with  
466 trait enhancing alleles contributed by Tumida. QTL mapping using conditional *Pbr* values  
467 [*Pbr|Df*] did not detect the QTL *S-Pbr-A10-1*, suggesting a pleiotropic control of *Pbr* and *Df*  
468 at this locus and thereby, limiting the scope of its use in the improvement of *Pbr* in the Indian  
469 gene pool lines.

470 The regression analysis of *Pbr* with *Df* revealed several lines with low *Df* and high *Pbr*  
471 suggesting a scope of improvement of *Pbr* without increasing *Df* (Fig. 3). We identified two  
472 QTL – *Pbr-A03-1<sup>C</sup>* and *Pbr-B03-2<sup>C</sup>* in the conditional analysis (Table 4) with trait enhancing  
473 alleles from Tumida, which can be used to improve *Pbr* in the Indian gene pool lines without  
474 negative effects on *Df*.

#### 475 **Engineering resistance to lodging in *B. juncea***

476 Stem strength is one of the key factors influencing lodging in crops (Kashiwagi and Ishimaru  
477 2004; Ookawa et al. 2014; Wei et al. 2017; Miller et al. 2018). The four stem strength-related  
478 traits tested in the study showed moderate heritability; some significant QE interactions were  
479 observed in a few *Bf*, *Pf*, and *Bs* QTL (Table S8). We observed transgressive segregation for  
480 stem strength in the TUV population (Fig. S1) which was substantiated by the QTL analysis  
481 wherein both the parents have been shown to contain the QTL for increased stem strength  
482 (Tables S6 and S7). Several minor but Stable QTL for stem strength (*S-Pf-A07-1* and *S-Pf-*  
483 *B07-1*) were contributed by Tumida which explains the transgressive segregation observed  
484 for the trait with several TUV lines showing higher stem strength than the better parent,  
485 Varuna (Fig. S1). These QTL could be used to further improve the stem strength of the Indian  
486 gene pool lines of *B. juncea*.

487 Varuna, which is the better parent for stem strength, contributed the major Stable QTL for *Pf*  
488 (*S-Pf-A10-1*) and *Bf* (*S-Bf-A10-1*), both on LG A10. This is consistent with the observation of  
489 a reduced number of interfascicular sclerenchymatous cell layers in the transverse stem  
490 sections of Tumida (Fig. 2). A correlation of reduced stem vascular tissues with stem lodging  
491 has also been previously reported in the *MYB43* RNAi lines of *B. napus* (Jiang et al. 2020).  
492 The stem strength QTL with beneficial alleles from Varuna could be used to improve the  
493 good combiners of hybrids in the east European gene pool with low stem strength, e.g., *B.*  
494 *junceae* lines EH-2 and S7 (Table S13). The Indian gene pool lines of *B. juncea* have a narrow  
495 genetic diversity (Srivastava et al. 2001; Burton et al. 2004), however, we observed high  
496 variability in the stem strength-related traits within the Indian gene pool lines (Table S13).  
497 The stem strength QTL – *S-Pf-A10-1* and *S-Bf-A10-1* on LG A10 with beneficial alleles  
498 contributed by Varuna can also be used to improve the trait in the Indian gene pool lines  
499 having low stem strength.

500 We observed a high correlation of stem strength-related traits (*Pf* and *Bf*) with stem diameter  
501 (*Dia*) (Table 2). A high correlation between absolute stem strength and stem diameter has  
502 also been reported in *B. napus* (Miller et al. 2018). An overlap was observed in the  
503 confidence intervals of the Stable QTL identified for these traits on LGs A07, A10, and B07  
504 (Fig. 4, Table S6, and Table S7). Based on these results, a pleiotropic control of stem strength  
505 and stem diameter could be hypothesized at these loci. Since the beneficial alleles for both *Pf*  
506 and *Dia* in the QTL with overlapping confidence intervals on LGs A07 and B07 are  
507 contributed by Tumida, these loci could be used to simultaneously improve stem strength and  
508 diameter in the Indian gene pool lines. A Stable locus for *Dia* (*S-Dia-A10-1*) was identified in  
509 the QTL cluster on LG A10 with the beneficial allele from Varuna. The locus contains  
510 *CSLD2* and *PIN5* genes that have been previously implicated in the control of stem diameter  
511 in *Arabidopsis* and *Populus* (Yin et al. 2011; Zheng et al. 2021).

512 Most of the mustard cultivars grown in India have high *Bih* with branches initiating up to 1m  
513 from the ground. These lines are more prone to top lodging under stormy conditions at  
514 maturity due to top-heavy branches resulting in substantial yield losses (Chakrabarty et al.  
515 1994). Therefore, the reduction of *Bih* is a major objective for mustard improvement  
516 programs in India. *Bih* showed a significant positive correlation with *Df* and *Plht* in the TUV  
517 population (Table 2). This is consistent with a previous study in *B. napus* which showed a  
518 significant positive correlation and co-localization of the QTL for the two traits (Shen et al.  
519 2018). However, Vijayakumar et al. (1996) reported a negative correlation of *Bih* with plant

520 height and flowering time in *B. juncea*. We observed a high positive correlation (Table 2) and  
521 an overlap between the QTL for *Bih* and *Df* (Tables S6 and S7). The overlap between the  
522 Stable *Bih* and *Df* QTL on LGs A10 and A03 (Fig. 4) is not of major consequence for  
523 breeding since the alleles reducing both *Bih* and *Df* are contributed by Varuna in the  
524 overlapping QTL. The overlapping Stable QTL for *Bih* (*S-Bih-A03-1*) and *Df* (*S-Df-A03-1*)  
525 on LG A03 contained the *TFL1* gene (Table S12) that has been previously implicated to  
526 pleiotropically control branch number, *Df* and branch initiation height in *B. napus* (Sriboon et  
527 al. 2020). Tumida contributed the allele for reduction of *Bih* in *S-Bih-A06-1*, therefore, this  
528 locus can be introgressed in the Indian gene pool lines to reduce the branch initiation height.

529 The use of dwarfing genes has been shown to improve the resistance to plant lodging in *B.*  
530 *napus* (Muangprom et al. 2006; Liu et al. 2010; Yang et al. 2021). Therefore, the  
531 introgression of the *S-Plht-A06-1* locus from Tumida could further improve the lodging  
532 resistance of the Indian gene pool lines via reduction of *Plht*. Though Tumida shows a low  
533 trait value for *Plht* as compared to Varuna, it contributed a major QTL *S-Plht-A10-1* for the  
534 enhancement of the trait. Significantly, no overlap was observed in the QTL identified for  
535 stem strength and *Plht*, which provides an opportunity to simultaneously introgress beneficial  
536 loci for these traits to tackle the problem of plant lodging.

## 537 **Conclusions**

538 We used a high-density linkage map to identify 20 Stable QTL for nine plant architectural  
539 traits related to stem strength, stem diameter, plant height, shoot branching, and days to  
540 flowering in the TUV F<sub>1</sub>DH population. The Chinese stem type mustard, Tumida contributed  
541 positive alleles for all the nine architectural traits and could be a novel source for beneficial  
542 alleles for further improvement of these traits in the Indian gene pool lines. The QTL cluster  
543 on A10 contains a major locus for *Df* and is critical for the early flowering of the Indian gene  
544 pool lines therefore, no introgressions can be made in the Indian gene pool lines in this  
545 region. The study has identified conditional QTL for *Pbr* with trait enhancing alleles  
546 contributed by Tumida, which could be used to improve the trait without negative effects on  
547 *Df*. The QTL for *Pf*, *Bf*, *Sf*, *Dia*, *Bih*, and *Plht* identified in the study could be used for the  
548 genetic improvement of lodging resistance in *B. juncea* by the enhancement of stem strength  
549 in addition to an increase in stem diameter and a reduction in branch initiation height and  
550 total plant height. The Stable QTL for plant architectural traits could be introgressed into pure  
551 lines or combiners of hybrids that lack the superior alleles for the mapped architectural traits.

552 Altogether, the findings reported in the study have revealed the genetic control of some of the  
553 key plant architectural traits and would find application in breeding for improved ideotypes in  
554 *B. juncea*.

## 555 **References**

- 556 Aakanksha, Yadava SK, Yadav BG, et al (2021) Genetic analysis of heterosis for yield  
557 influencing traits in *Brassica juncea* using a doubled haploid population and its  
558 backcross progenies. *Front Plant Sci* 12:1936. <https://doi.org/10.3389/fpls.2021.721631>
- 559 Arora H, Padmaja KL, Paritosh K, et al (2019) *BjuWRR1*, a CC-NB-LRR gene identified in  
560 *Brassica juncea*, confers resistance to white rust caused by *Albugo candida*. *Theor Appl*  
561 *Genet* 132:2223–2236. <https://doi.org/10.1007/s00122-019-03350-z>
- 562 Barbier FF, Dun EA, Kerr SC, et al (2019) An update on the signals controlling shoot  
563 branching. *Trends Plant Sci* 24:220–236.  
564 <https://doi.org/10.1016/J.TPLANTS.2018.12.001>
- 565 Burton WA, Ripley VL, Potts DA, Salisbury PA (2004) Assessment of genetic diversity in  
566 selected breeding lines and cultivars of canola quality *Brassica juncea* and their  
567 implications for canola breeding. *Euphytica* 136:181–192.  
568 <https://doi.org/10.1023/B:EUPH.0000030672.56206.f0>
- 569 Chakrabarty SK, Arunachalam V, Rao PSK, Vijayakumar CHM (1994) Genetics of basal  
570 branching in intra- and inter-specific crosses of Brassica. *Crucif Newsl* 16:23–24
- 571 Chen H, Wang T, He X, et al (2022) BRAD V3.0: an upgraded Brassicaceae database.  
572 *Nucleic Acids Res* 50:D1432–D1441. <https://doi.org/10.1093/NAR/GKAB1057>
- 573 Churchill GA, Doerge RW (1994) Empirical threshold values for quantitative trait mapping.  
574 *Genetics* 138:963–971. <https://doi.org/10.1093/genetics/138.3.963>
- 575 Conesa A, Götz S, García-Gómez JM, et al (2005) Blast2GO: A universal tool for annotation,  
576 visualization and analysis in functional genomics research. *Bioinformatics* 21:3674–  
577 3676. <https://doi.org/10.1093/bioinformatics/bti610>
- 578 Dhaka N, Rout K, Yadava SK, et al (2017) Genetic dissection of seed weight by QTL  
579 analysis and detection of allelic variation in Indian and east European gene pool lines of  
580 *Brassica juncea*. *Theor Appl Genet* 130:293–307. <https://doi.org/10.1007/s00122-016-2811-2>
- 582 Domagalska MA, Leyser O (2011) Signal integration in the control of shoot branching. *Nat.*  
583 *Rev Mol Cell Biol* 12:211–221
- 584 Guo W, Chen L, Herrera-Estrella L, et al (2020) Altering plant architecture to improve  
585 performance and resistance. *Trends Plant Sci* 25:1154–1170
- 586 Janssen BJ, Drummond RSM, Snowden KC (2014) Regulation of axillary shoot  
587 development. *Curr Opin Plant Biol* 17:28–35
- 588 Jat RS, Singh VV, Sharma P, Rai PK (2019) Oilseed Brassica in India: demand, supply,  
589 policy perspective and future potential. *OCL - Oilseeds fats, Crop Lipids* 26:8
- 590 Jiang J, Liao X, Jin X, et al (2020) *MYB43* in oilseed rape (*Brassica napus*) positively  
591 regulates vascular lignification, plant morphology and yield potential but negatively  
592 affects resistance to *Sclerotinia sclerotiorum*. *Genes (Basel)* 11:581.  
593 <https://doi.org/10.3390/genes11050581>
- 594 Kang L, Qian L, Zheng M, et al (2021) Genomic insights into the origin, domestication and  
595 diversification of *Brassica juncea*. *Nat Genet* 53:1392–1402.

- 596 <https://doi.org/10.1038/s41588-021-00922-y>
- 597 Kashiwagi T, Ishimaru K (2004) Identification and functional analysis of a locus for  
598 improvement of lodging resistance in rice. *Plant Physiol* 134:676–683.  
599 <https://doi.org/10.1104/pp.103.029355>
- 600 Li ZK, Luo LJ, Mei HW, et al (2001) Overdominant epistatic loci are the primary genetic  
601 basis of inbreeding depression and heterosis in rice. I. Biomass and grain yield. *Genetics*  
602 158:1737–1753. <https://doi.org/10.1093/genetics/158.4.1737>
- 603 Liu C, Wang J, Huang T, et al (2010) A missense mutation in the VHYNP motif of a DELLA  
604 protein causes a semi-dwarf mutant phenotype in *Brassica napus*. *Theor Appl Genet*  
605 121:249–258. <https://doi.org/10.1007/s00122-010-1306-9>
- 606 Liu L, Liu C, Hou X, et al (2012) *FTIP1* is an essential regulator required for Florigen  
607 transport. *PLOS Biol* 10:e1001313. <https://doi.org/10.1371/JOURNAL.PBIO.1001313>
- 608 Miller CN, Harper AL, Trick M, et al (2018) Dissecting the complex regulation of lodging  
609 resistance in *Brassica napus*. *Mol Breed* 38:1-18. <https://doi.org/10.1007/s11032-018-0781-6>  
610
- 611 Muangprom A, Mauriera I, Osborn TC (2006) Transfer of a dwarf gene from *Brassica rapa*  
612 to oilseed *B. napus*, effects on agronomic traits, and development of a “perfect” marker  
613 for selection. *Mol Breed* 17:101–110. <https://doi.org/10.1007/s11032-005-3734-9>
- 614 Mukhopadhyay A, Arumugam N, Sodhi YS, et al (2007) High frequency production of  
615 microspore derived doubled haploids (DH) and its application for developing low  
616 glucosinolate lines in Indian *Brassica juncea*. 12th Int Rapeseed Congr 333–336
- 617 Olivoto T, Lúcio ADC (2020) metan: An R package for multi-environment trial analysis.  
618 *Methods Ecol Evol* 11:783–789. <https://doi.org/10.1111/2041-210X.13384>
- 619 Ookawa T, Inoue K, Matsuoka M, et al (2014) Increased lodging resistance in long-culm,  
620 low-lignin *gh2* rice for improved feed and bioenergy production. *Sci Rep* 4:1–9.  
621 <https://doi.org/10.1038/srep06567>
- 622 Padmaja KL, Agarwal P, Gupta V, et al (2014) Natural mutations in two homoeologous *TT8*  
623 genes control yellow seed coat trait in allotetraploid *Brassica juncea* (AABB). *Theor*  
624 *Appl Genet* 127:339–347. <https://doi.org/10.1007/s00122-013-2222-6>
- 625 Panjabi-Massand P, Yadava SK, Sharma P, et al (2010) Molecular mapping reveals two  
626 independent loci conferring resistance to *Albugo candida* in the east European  
627 germplasm of oilseed mustard *Brassica juncea*. *Theor Appl Genet* 121:137–145.  
628 <https://doi.org/10.1007/s00122-010-1297-6>
- 629 Paritosh K, Yadava SK, Singh P, et al (2021) A chromosome-scale assembly of allotetraploid  
630 *Brassica juncea* (AABB) elucidates comparative architecture of the A and B genomes.  
631 *Plant Biotechnol J* 19:602–614. <https://doi.org/10.1111/pbi.13492>
- 632 Pradhan AK, Sodhi YS, Mukhopadhyay A, Pental D (1993) Heterosis breeding in Indian  
633 mustard (*Brassica juncea* L. Czern & Coss): analysis of component characters  
634 contributing to heterosis for yield. *Euphytica* 69:219–229.  
635 <https://doi.org/10.1007/BF00022368>
- 636 Ramchiary N, Padmaja KL, Sharma S, et al (2007) Mapping of yield influencing QTL in  
637 *Brassica juncea*: implications for breeding of a major oilseed crop of dryland areas.



- 638 Theor Appl Genet 115:807–817. <https://doi.org/10.1007/s00122-007-0610-5>
- 639 Rout K, Yadav BG, Yadava SK, et al (2018) QTL landscape for oil content in *Brassica*  
640 *juncea*: analysis in multiple bi-parental populations in high and “0” erucic background.  
641 Front Plant Sci 871:1448. <https://doi.org/10.3389/fpls.2018.01448>
- 642 Samach A, Onouchi H, Gold SE, et al (2000) Distinct roles of CONSTANS target genes in  
643 reproductive development of *Arabidopsis*. Science 288:1613–1616.  
644 <https://doi.org/10.1126/science.288.5471.1613>
- 645 Shen Y, Xiang Y, Xu E, et al (2018) Major co-localized QTL for plant height, branch  
646 initiation height, stem diameter, and flowering time in an alien introgression derived  
647 *Brassica napus* DH population. Front Plant Sci 9:1–13.  
648 <https://doi.org/10.3389/fpls.2018.00390>
- 649 Sirisha PK, Prasad RG, Hussain AS, et al (2005) iMAS: an integrated decision support  
650 system for marker-assisted plant breeding. Poster presented at the Generation Challenge  
651 Programme, Annual Research Meeting; Rome, Italy
- 652 Sodhi YS, Chandra A, Verma JK, et al (2006) A new cytoplasmic male sterility system for  
653 hybrid seed production in Indian oilseed mustard *Brassica juncea*. Theor Appl Genet  
654 114:93–99. <https://doi.org/10.1007/s00122-006-0413-0>
- 655 Sriboon S, Li H, Guo C, et al (2020) Knock-out of *TERMINAL FLOWER 1* genes altered  
656 flowering time and plant architecture in *Brassica napus*. BMC Genet 21:1–13.  
657 <https://doi.org/10.1186/S12863-020-00857-Z/FIGURES/5>
- 658 Srivastava A, Gupta V, Pental D, Pradhan AK (2001) AFLP-based genetic diversity  
659 assessment amongst agronomically important natural and some newly synthesized lines  
660 of *Brassica juncea*. Theor Appl Genet 102:193–199.  
661 <https://doi.org/10.1007/s001220051635>
- 662 Taylor J, Butler D (2017) R package ASMap: efficient genetic linkage map construction and  
663 diagnosis. J Stat Softw 79:. <https://doi.org/10.18637/jss.v079.i06>
- 664 Utz HF (2001) PLABSTAT: a computer program for statistical analysis of plant breeding  
665 experiments. Inst Plant Breeding, Seed Sci Popul Genet Univ Hohenheim, Stuttgart
- 666 Vijayakumar C, Arunachalam V, Chakrabarty SK, Rao PSK (1996) Ideotype and relationship  
667 between morpho-physiological characters and yield in indian mustard (*Brassica juncea*).  
668 Indian J Agric Sci 66:633–637
- 669 Wang B, Smith SM, Li J (2018) Genetic regulation of shoot architecture. Annu Rev Plant  
670 Biol 69:437–468
- 671 Wang S (2007) Windows QTL cartographer 2.5. [http://statgen.ncsu.edu/qtlcart/WQTLCart](http://statgen.ncsu.edu/qtlcart/WQTLCart.html)  
672 html
- 673 Wang Y, Li J (2006) Genes controlling plant architecture. Curr Opin Biotechnol 17:123–129
- 674 Wei L, Jian H, Lu K, et al (2017) Genetic and transcriptomic analyses of lignin- and lodging-  
675 related traits in *Brassica napus*. Theor Appl Genet 130:1961–1973.  
676 <https://doi.org/10.1007/s00122-017-2937-x>
- 677 Xu H, Zhang R, Wang M, et al (2022) Identification and characterization of QTL for spike  
678 morphological traits, plant height and heading date derived from the D genome of



- 679 natural and resynthetic allohexaploid wheat. *Theor Appl Genet* 135:389–403.  
680 <https://doi.org/10.1007/s00122-021-03971-3>
- 681 Yadava SK, Arumugam N, Mukhopadhyay A, et al (2012) QTL mapping of yield-associated  
682 traits in *Brassica juncea*: meta-analysis and epistatic interactions using two different  
683 crosses between east European and Indian gene pool lines. *Theor Appl Genet* 125:1553–  
684 1564. <https://doi.org/10.1007/s00122-012-1934-3>
- 685 Yang J, Liu D, Wang X, et al (2016) The genome sequence of allopolyploid *Brassica juncea*  
686 and analysis of differential homoeolog gene expression influencing selection. *Nat Genet*  
687 48:1225–1232. <https://doi.org/10.1038/ng.3657>
- 688 Yang J, Zhu J, Williams RW (2007) Mapping the genetic architecture of complex traits in  
689 experimental populations. *Bioinformatics* 23:1527–1536.  
690 <https://doi.org/10.1093/bioinformatics/btm143>
- 691 Yang M, He J, Wan S, et al (2021) Fine mapping of the *BnaC04.BIL1* gene controlling plant  
692 height in *Brassica napus* L. *BMC Plant Biol* 21:1–11. <https://doi.org/10.1186/s12870-021-03137-9>
- 694 Yin L, Verhertbruggen Y, Oikawa A, et al (2011) The cooperative activities of *CSLD2*,  
695 *CSLD3*, and *CSLD5* are required for normal *Arabidopsis* development. *Mol Plant*  
696 4:1024–1037. <https://doi.org/10.1093/MP/SSR026>
- 697 Zheng S, He J, Lin Z, et al (2021) Two MADS-box genes regulate vascular cambium activity  
698 and secondary growth by modulating auxin homeostasis in *Populus*. *Plant Commun*  
699 2:100134. <https://doi.org/10.1016/j.xplc.2020.100134>
- 700 Zhu J (1995) Analysis of conditional genetic effects and variance components in  
701 developmental genetics. *Genetics* 141:1633–1639.  
702 <https://doi.org/10.1093/genetics/141.4.1633>

703 **Statements & Declarations**

704 **Author Contributions**

705 PS, SM, and VG carried out the phenotyping. SM, PS, and SKY carried out the data analysis  
706 and mapping work. SM performed the stem anatomy and candidate gene analyses. DP and  
707 AKP conceived and supervised the overall study. SM and DP drafted the manuscript. All the  
708 authors reviewed and approved the final draft of the manuscript.

709 **Acknowledgements**

710 We thank Satish Giri for his help with the field experiments. Microscopy was carried out at  
711 the Central Instrumentation Facility, University of Delhi South Campus. The research was  
712 supported by the Department of Biotechnology (DBT), Government of India, under the  
713 project ‘DBT-UDSC partnership Centre on Genetic Manipulation of Brassicas’, grant number  
714 – BT/01/NDDB/UDSC/2016. SM was supported by a research fellowship (Ref. no.  
715 19/06/2016(i)EU-V) from the University Grants Commission (UGC).

716 **Competing Interests:** The authors declare no competing interests.

717 **Data Availability:** The datasets generated during and/or analyzed during the current study  
718 are available from the corresponding author on request.

719 **Ethical standards:** The experiments were performed in compliance with the laws of India.

**Tables:**

**Table 1** Average trait values of Tumida, Varuna, and TUV-F<sub>1</sub> and trait statistics on adjusted mean values (BLUP values) of the TUV population for the nine plant architectural traits

| Trait       | Mean   |        |                    | F <sub>1</sub> DH population range | F <sub>1</sub> DH population mean ± S.D. |
|-------------|--------|--------|--------------------|------------------------------------|------------------------------------------|
|             | Tumida | Varuna | TUV-F <sub>1</sub> |                                    |                                          |
| <i>Bf</i>   | 10.7   | 16.64  | 13.78              | 6.5-27.35                          | 14.82 ± 3.5                              |
| <i>Sf</i>   | 9.23   | 20.64  | 17.84              | 13.29-27.05                        | 16.95 ± 1.95                             |
| <i>Pf</i>   | 98.93  | 113.57 | 110.75             | 80.57-127.72                       | 103.82 ± 9.61                            |
| <i>Bs</i>   | 0.54   | 1.43   | 1.39               | 0.8-2.09                           | 1.27 ± 0.16                              |
| <i>Dia</i>  | 3.84   | 3.95   | 3.55               | 2.88-4.88                          | 3.76 ± 0.37                              |
| <i>Plht</i> | 134.32 | 180.36 | 208.4              | 154.25-256.11                      | 210.55 ± 23.11                           |
| <i>Bih</i>  | 38.77  | 51.42  | 89.98              | 17.05-143.09                       | 76.71 ± 30.16                            |
| <i>Pbr</i>  | 10.26  | 5.03   | 8.82               | 2.99-13.43                         | 7.04 ± 2.19                              |
| <i>Df</i>   | 131.12 | 42.8   | 77.51              | 42.77-123.13                       | 79.81 ± 21.49                            |

*Bf*, *Sf*, *Pf*, *Bs*, *Dia*, *Plht*, *Bih*, *Pbr*, and *Df* represent bend force, stab force, press force, breaking strength, stem diameter, plant height, branch initiation height, number of primary branches, and days to flower, respectively.

**Table 2** The Pearson correlation coefficients amongst the adjusted mean (BLUP) values of the nine plant architectural traits

|             | <i>Pf</i> | <i>Sf</i> | <i>Bf</i> | <i>Bs</i> | <i>Dia</i> | <i>Plht</i> | <i>Bih</i> | <i>Pbr</i> |
|-------------|-----------|-----------|-----------|-----------|------------|-------------|------------|------------|
| <i>Sf</i>   | 0.607**   |           |           |           |            |             |            |            |
| <i>Bf</i>   | 0.824**   | 0.713**   |           |           |            |             |            |            |
| <i>Bs</i>   | 0.568**   | 0.826**   | 0.674**   |           |            |             |            |            |
| <i>Dia</i>  | 0.728**   | 0.386**   | 0.847**   | 0.222**   |            |             |            |            |
| <i>Plht</i> | -0.058    | 0.082     | -0.075    | 0.215**   | -0.219**   |             |            |            |
| <i>Bih</i>  | -0.269**  | -0.102    | -0.308**  | 0.039     | -0.437**   | 0.832**     |            |            |
| <i>Pbr</i>  | -0.356**  | -0.075    | -0.351**  | 0.095     | -0.548**   | 0.668**     | 0.779**    |            |
| <i>Df</i>   | -0.497**  | -0.403**  | -0.537**  | -0.226**  | -0.591**   | 0.592**     | 0.837**    | 0.737**    |

\*significant at 5%

\*\*significant at 1%

*Bf*, *Sf*, *Pf*, *Bs*, *Dia*, *Plht*, *Bih*, *Pbr*, and *Df* represent bend force, stab force, press force, breaking strength, stem diameter, plant height, branch initiation height, number of primary branches, and days to flower, respectively.

**Table 3** The Stable QTL detected for plant architectural traits in the TUV population. Major QTL ( $R^2 \geq 10\%$ ) have been highlighted in bold. BLUP, Best Linear Unbiased Prediction; SE, single environment; T1, trial 1; T2, trial 2; T3, trial 3; T4, trial 4;  $R^2$ , phenotypic variance explained by the QTL; P, parent contributing the trait enhancing allele; T, Tumida; V, Varuna; CI, confidence interval

| Trait                          | Stable QTL                 | QTL detected using BLUPs             | QTL detected using SE trait values                                                      | Same QTL detected by QTL Network 2.0 | $R^2$ (%) | P | CI (cM)     |
|--------------------------------|----------------------------|--------------------------------------|-----------------------------------------------------------------------------------------|--------------------------------------|-----------|---|-------------|
| Stem strength-related traits   | <i>S-Pf-A07-1</i>          | <i>Pf-A07-1<sup>B</sup></i>          | <i>Pf-A07-2<sup>T3</sup>, Pf-A07-2<sup>T4</sup></i>                                     | <i>Pf-A07-1.QN</i>                   | 7.7       | T | 105.1-121   |
|                                | <b><i>S-Pf-A10-1</i></b>   | <b><i>Pf-A10-1<sup>B</sup></i></b>   | <b><i>Pf-A10-1<sup>T2</sup>, Pf-A10-1<sup>T3</sup>, Pf-A10-1<sup>T4</sup></i></b>       | <b><i>Pf-A10-1.QN</i></b>            | 23.0      | V | 55.3-59.4   |
|                                | <i>S-Pf-B07-1</i>          | <i>Pf-B07-1<sup>B</sup></i>          | <i>Pf-B07-1<sup>T2</sup>, Pf-B07-1<sup>T4</sup></i>                                     | <i>Pf-B07-1.QN</i>                   | 7.1       | T | 198.2-200.6 |
|                                | <i>S-Sf-A09-1</i>          | <i>Sf-A09-1<sup>B</sup></i>          | <i>Sf-A09-1<sup>T2</sup>, Sf-A09-1<sup>T3</sup>, Sf-A09-1<sup>T4</sup></i>              | <i>Sf-A09-1.QN</i>                   | 4.9       | V | 129.5-138.9 |
|                                | <i>S-Sf-A10-1</i>          | <i>Sf-A10-1<sup>B</sup></i>          | <b><i>Sf-A10-2<sup>T3</sup>, Sf-A10-2<sup>T4</sup></i></b>                              | <i>Sf-A10-1.QN</i>                   | 9.2       | V | 78.3-89.3   |
|                                | <i>S-Sf-B06-1</i>          | <i>Sf-B06-1<sup>B</sup></i>          | <i>Sf-B06-2<sup>T2</sup>, Sf-B06-2<sup>T4</sup></i>                                     | <i>Sf-B06-1.QN</i>                   | 5.4       | V | 229.5-246.6 |
|                                | <b><i>S-Bf-A10-1</i></b>   | <b><i>Bf-A10-1<sup>B</sup></i></b>   | <b><i>Bf-A10-1<sup>T2</sup>, Bf-A10-1<sup>T4</sup></i></b>                              | <b><i>Bf-A10-1.QN</i></b>            | 19.5      | V | 53.1-65.8   |
| Stem diameter                  | <i>S-Dia-A07-1</i>         | <i>Dia-A07-1<sup>B</sup></i>         | <i>Dia-A07-1<sup>T3</sup>, Dia-A07-1<sup>T4</sup></i>                                   | <i>Dia-A07-1.QN</i>                  | 5.5       | T | 114.4-121.6 |
|                                | <b><i>S-Dia-A10-1</i></b>  | <b><i>Dia-A10-1<sup>B</sup></i></b>  | <b><i>Dia-A10-1<sup>T2</sup>, Dia-A10-1<sup>T4</sup></i></b>                            | <b><i>Dia-A10-1.QN</i></b>           | 14.4      | V | 45.1-51.2   |
|                                | <i>S-Dia-B07-1</i>         | <i>Dia-B07-1<sup>B</sup></i>         | <b><i>Dia-B07-2<sup>T2</sup>, Dia-B07-2<sup>T3</sup>, Dia-B07-2<sup>T4</sup></i></b>    | <i>Dia-B07-1.QN</i>                  | 4.8       | T | 190.7-200.6 |
| Plant height                   | <i>S-Plht-A06-1</i>        | <i>Plht-A06-1<sup>B</sup></i>        | <i>Plht-A06-1<sup>T1</sup>, Plht-A06-1<sup>T4</sup></i>                                 | <i>Plht-A06-1.QN</i>                 | 6.3       | V | 78.6-93     |
|                                | <b><i>S-Plht-A10-1</i></b> | <b><i>Plht-A10-1<sup>B</sup></i></b> | <b><i>Plht-A10-1<sup>T1</sup>, Plht-A10-1<sup>T2</sup>, Plht-A10-1<sup>T4</sup></i></b> | <b><i>Plht-A10-1.QN</i></b>          | 11.3      | T | 43.1-50.7   |
| Shoot branching-related traits | <b><i>S-Bih-A03-1</i></b>  | <b><i>Bih-A03-1<sup>B</sup></i></b>  | <b><i>Bih-A03-3<sup>T1</sup>, Bih-A03-3<sup>T2</sup>, Bih-A03-3<sup>T4</sup></i></b>    | <b><i>Bih-A03-1.QN</i></b>           | 24        | T | 142.7-148.2 |
|                                | <i>S-Bih-A06-1</i>         | <i>Bih-A06-1<sup>B</sup></i>         | <b><i>Bih-A06-1<sup>T1</sup>, Bih-A06-1<sup>T2</sup>, Bih-A06-1<sup>T4</sup></i></b>    | <i>Bih-A06-1.QN</i>                  | 10.4      | V | 88.1-95.2   |
|                                | <i>S-Bih-A10-1</i>         | <i>Bih-A10-1<sup>B</sup></i>         | <b><i>Bih-A10-1<sup>T1</sup>, Bih-A10-1<sup>T2</sup>, Bih-A10-1<sup>T4</sup></i></b>    | <i>Bih-A10-1.QN</i>                  | 21.4      | T | 43.7-46.5   |
|                                | <b><i>S-Pbr-A10-1</i></b>  | <b><i>Pbr-A10-1<sup>B</sup></i></b>  | <b><i>Pbr-A10-1<sup>T1</sup>, Pbr-A10-1<sup>T2</sup>, Pbr-A10-1<sup>T4</sup></i></b>    | <b><i>Pbr-A10-1.QN</i></b>           | 18.8      | T | 51.7-56.7   |
|                                | <i>S-Pbr-B06-1</i>         | <i>Pbr-B06-1<sup>B</sup></i>         | <i>Pbr-B06-1<sup>T1</sup>, Pbr-B06-1<sup>T2</sup>, Pbr-B06-1<sup>T4</sup></i>           | <i>Pbr-B06-1.QN</i>                  | 4.4       | V | 176.2-184.4 |
|                                | <i>S-Pbr-B07-1</i>         | <i>Pbr-B07-1<sup>B</sup></i>         | <i>Pbr-B07-1<sup>T1</sup>, Pbr-B07-1<sup>T2</sup>, Pbr-B07-1<sup>T4</sup></i>           | <i>Pbr-B07-1.QN</i>                  | 5.7       | V | 194.1-200   |
| Days to flower                 | <b><i>S-Df-A03-1</i></b>   | <b><i>Df-A03-1<sup>B</sup></i></b>   | <b><i>Df-A03-1<sup>T1</sup>, Df-A03-1<sup>T2</sup>, Df-A03-1<sup>T4</sup></i></b>       | <b><i>Df-A03-1.QN</i></b>            | 15.3      | T | 141.3-148.2 |
|                                | <b><i>S-Df-A10-1</i></b>   | <b><i>Df-A10-1<sup>B</sup></i></b>   | <b><i>Df-A10-1<sup>T1</sup>, Df-A10-1<sup>T2</sup>, Df-A10-1<sup>T4</sup></i></b>       | <b><i>Df-A10-1.QN</i></b>            | 40.9      | T | 53.8-56.4   |

*Bf, Sf, Pf, Bs, Dia, Plht, Bih, Pbr, and Df* represent bend force, stab force, press force, breaking strength, stem diameter, plant height, branch initiation height, number of primary branches, and days to flower, respectively.

**Table 4** The QTL detected using conditional phenotypic values of Pbr [Pbr|Df, Pbr conditional on Df] in the TUV mapping population using Windows QTL Cartographer 2.5. Major QTL ( $R^2 \geq 10\%$ ) have been highlighted in bold. P, parent contributing the trait enhancing allele; T, Tumida; V, Varuna;  $R^2$ , phenotypic variance explained by the QTL; CI, confidence interval; SE, single environment; T1, trial 1; T2, trial 2; T3, trial 3; T4, trial 4; BLUP, Best Linear Unbiased Prediction

| Conditional QTL                     | P | Peak   | LOD   | Additive effect | $R^2$ (%) | CI (cM)     | QTL with overlapping CIs detected using SE trait values                                          | QTL with overlapping CIs detected using BLUPs |
|-------------------------------------|---|--------|-------|-----------------|-----------|-------------|--------------------------------------------------------------------------------------------------|-----------------------------------------------|
| <b><i>Pbr-A03-1<sup>C</sup></i></b> | T | 148.21 | 30.23 | 0.53            | 11.7      | 135-149.2   | <b><i>Pbr-A03-2<sup>T4</sup></i></b>                                                             | <b><i>Pbr-A03-2<sup>B</sup></i></b>           |
| <i>Pbr-A07-1<sup>C</sup></i>        | V | 90.51  | 14.92 | -0.35           | 5.4       | 89.3-107.7  | <i>Pbr-A07-1<sup>T1</sup></i> , <i>Pbr-A07-1<sup>T2</sup></i>                                    |                                               |
| <i>Pbr-B03-1<sup>C</sup></i>        | V | 149.11 | 13.19 | -0.37           | 4.8       | 139-150.8   |                                                                                                  |                                               |
| <i>Pbr-B03-2<sup>C</sup></i>        | T | 200.81 | 22.4  | 0.51            | 9         | 199.7-203.2 | <i>Pbr-B03-1<sup>T4</sup></i>                                                                    |                                               |
| <b><i>Pbr-B06-1<sup>C</sup></i></b> | V | 181.71 | 32.27 | -0.63           | 12.4      | 170.3-187.4 | <i>Pbr-B06-1<sup>T1</sup></i> , <i>Pbr-B06-1<sup>T2</sup></i> ,<br><i>Pbr-B06-1<sup>T4</sup></i> | <i>Pbr-B06-1<sup>B</sup></i>                  |

**Figures:**

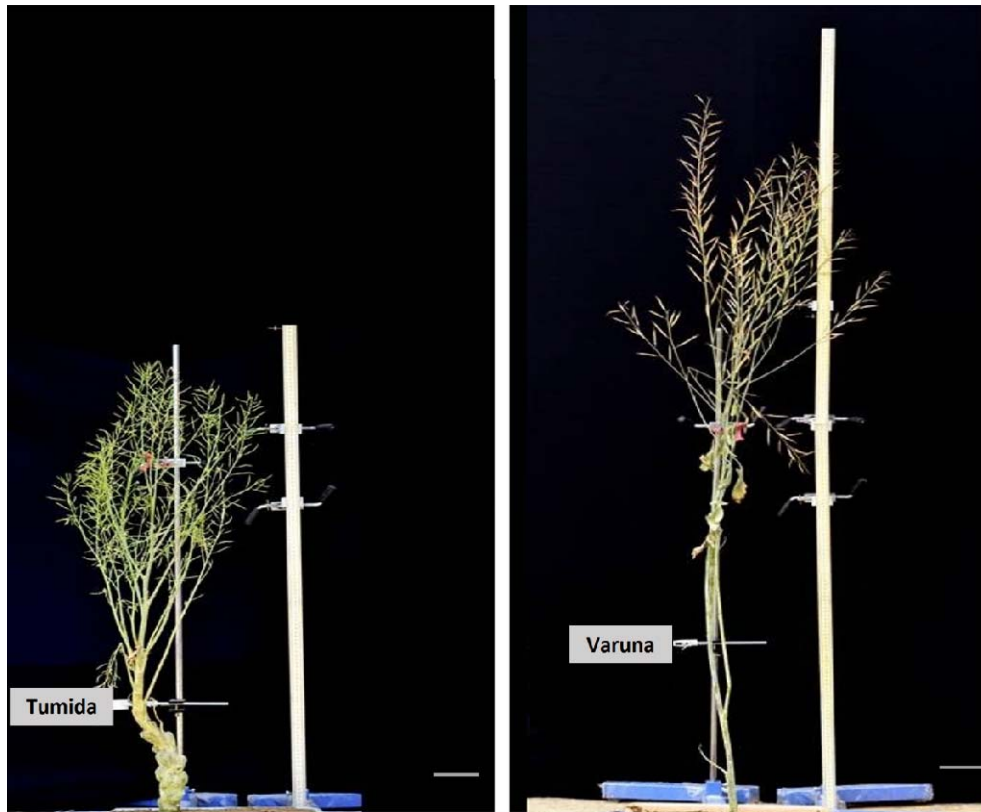

**Fig. 1** Morphotypes of Tumida and Varuna plants showing differences in their architecture at maturity

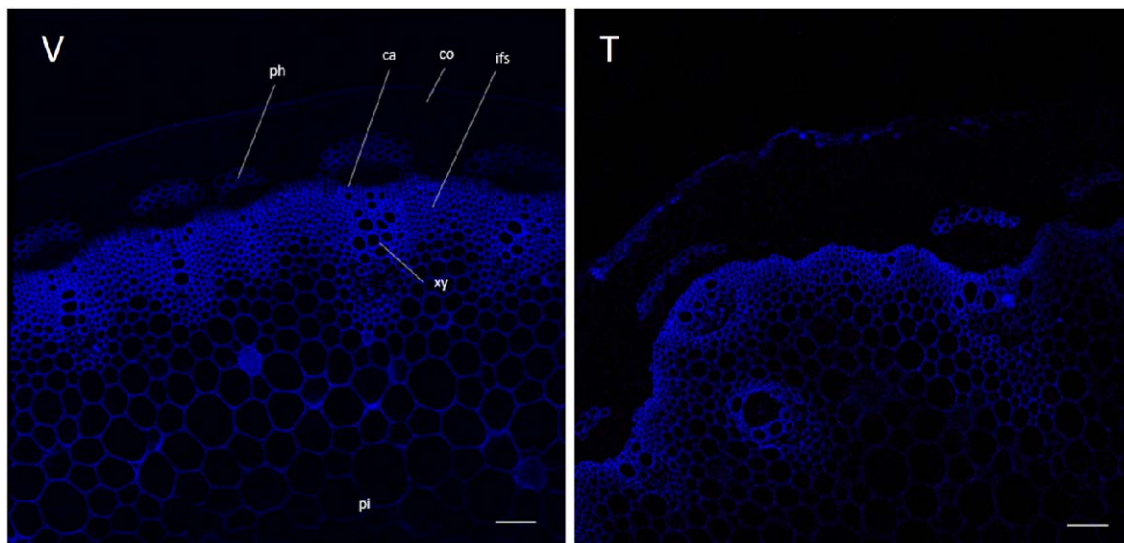

**Fig. 2** Stem sections of Varuna (V) and Tumida (T) showing blue UV autofluorescence from lignin. Scale bars represent 100  $\mu\text{m}$ . Abbreviations: co, cortex; xy, xylem; ph, phloem; ca, cambium; ifs, interfascicular sclerenchyma; pi, pith

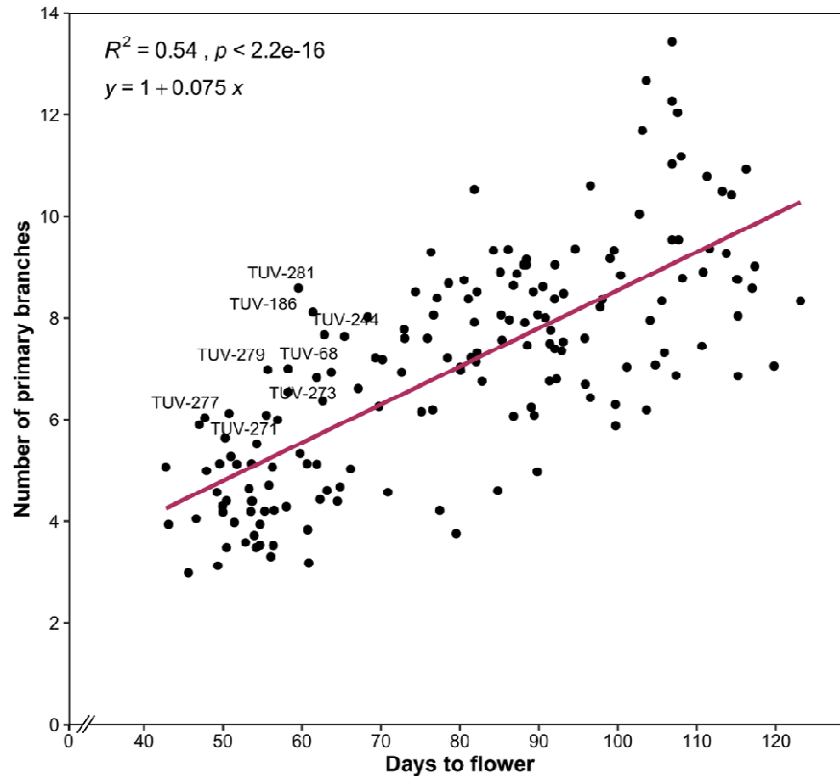

**Fig. 3** Regression of the number of primary branches (*Pbr*) trait on days to flowering (*Df*) in the TUV population

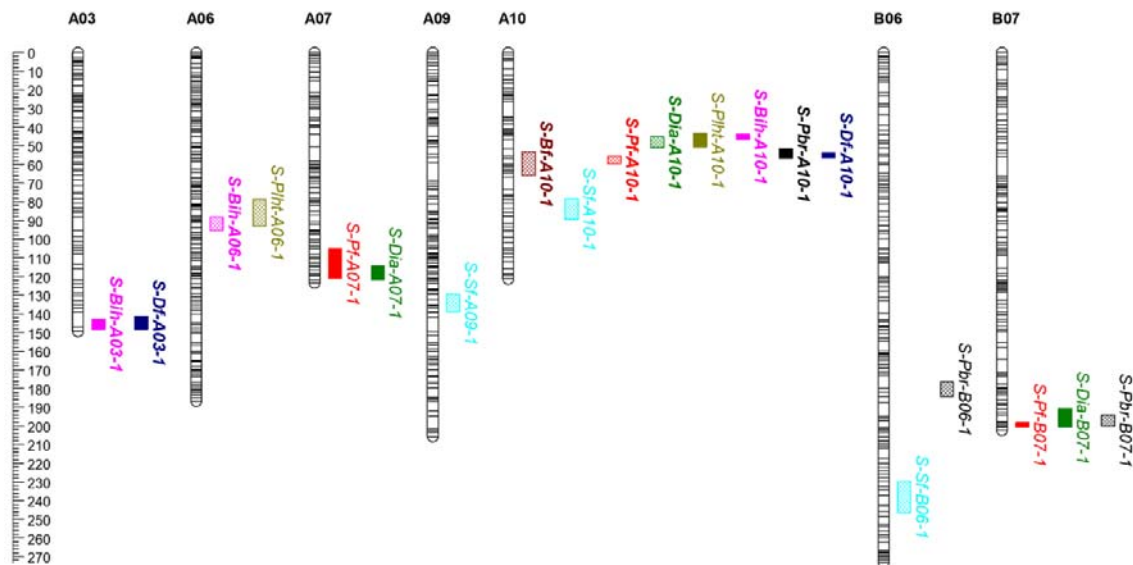

**Fig. 4** Genetic locations of Stable QTL regions associated with press force (*Pf*), stab force (*Sf*), bend force (*Bf*), breaking strength (*Bs*), stem diameter (*Dia*), plant height (*Plht*), branch initiation height (*Bih*), number of primary branches (*Pbr*) and days to flowering (*Df*). Uniform cM scale is shown on the left. Solid and checked bars represent the QTL from Tumida and Varuna, respectively. Major QTL ( $R^2 \geq 10\%$ ) are highlighted in bold



## Supplementary Material

### Supplementary figures:

**Fig. S1** The density histograms of TUV population for bend force (*Bf*), stab force (*Sf*), press force (*Pf*), breaking strength (*Bs*), stem diameter (*Dia*), plant height (*Plht*), branch initiation height (*Bih*), number of primary branches (*Pbr*), and days to flower (*Df*). Blue, red, and green arrows indicate Tumida, Varuna, and TUV-F<sub>1</sub>, respectively. The Y-axis represents the density (the ratio of frequency to group distance) for each trait

**Fig. S2** Anatomical and phenotypic differences in Tumida, Varuna and some strong (s) and weak (w) TUV population lines sampled at mature green stage. (a-f) Cross sections of mid-point of last internode showing differences in layers of interfascicular sclerenchyma tissue (depicted by yellow lines). Scale bars represent 50  $\mu$ m. g. Phenotypic differences (BLUPs) in stem diameter (*Dia*) and stem strength measures (*Bf*, bend force; *Bs*, breaking strength; *Sf*, stab force; *Pf*, press force)

### Supplementary tables:

**Table S1** Details of the trials conducted for phenotyping plant architectural traits in the TUV F<sub>1</sub>DH population

**Table S2** Distribution and density of GBS markers on the TUV linkage map

**Table S3** Positions of the GBS markers on the TUV linkage map

**Table S4** Trait statistics and broad sense heritability ( $H_B$ ) of plant architectural traits in TUV F<sub>1</sub>DH population in different phenotypic trials (T1, T2, T3, and T4). *Bf*, *Sf*, *Pf*, *Bs*, *Dia*, *Plht*, *Bih*, *Pbr*, and *Df* represent bend force, stab force, press force, breaking strength, stem diameter, plant height, branch initiation height, number of primary branches, and days to flower, respectively

**Table S5** Trait values (BLUPs) for plant architectural traits in TUV F<sub>1</sub>DH mapping population (169 lines). *Bf*, *Sf*, *Pf*, *Bs*, *Dia*, *Plht*, *Bih*, *Pbr*, and *Df* represent bend force, stab force, press force, breaking strength, stem diameter, plant height, branch initiation height, number of primary branches, and days to flower, respectively

**Table S6** Single environment (SE) QTL detected for all traits in TUV F<sub>1</sub>DH mapping population (169 lines) using Windows QTL Cartographer 2.5. Major QTL ( $R^2 \geq 10\%$ ) have been highlighted in bold.  $R^2$ , phenotypic variance explained by the QTL; T1, trial 1; T2, trial 2; T3, trial 3; T4, trial 4; T, Tumida; V, Varuna

**Table S7** QTL detected using BLUPs for nine traits in the TUV F<sub>1</sub>DH mapping population (169 lines) using Windows QTL Cartographer 2.5. Major QTL ( $R^2 \geq 10\%$ ) have been highlighted in bold.  $R^2$ , phenotypic variance explained by the QTL; T1, trial 1; T2, trial 2; T3, trial 3; T4, trial 4; T, Tumida; V, Varuna

**Table S8** The main effect QTL detected by QTL Network 2.0 in the TUV F<sub>1</sub>DH mapping population. The main effect QTL also independently detected by Windows QTL Cartographer 2.5 are highlighted in bold. The QTL showing significant ( $p \leq 0.05$ ) QTL  $\times$  environment interactions are highlighted in blue. A, additive effect; AE, additive effect due to QTL-environment interaction;  $h^2(a)$ , phenotypic variance explained by the QTL;  $h^2AE$ , phenotypic variance explained by the QTL  $\times$  environment interaction; T1, trial 1; T2, trial 2; T3, trial 3; T4, trial 4; T, Tumida; V, Varuna; *Bih*, branch initiation height; *Df*, days to flower; *Pbr*, number of primary branches; *Plht*, plant height; *Dia*, stem diameter; *Bf*, bend force; *Sf*, stab force; *Pf*, press force; *Bs*, breaking strength

**Table S9** Epistatic interactions between QTL detected by QTL Network 2.0 for plant architectural traits in TUV F<sub>1</sub>DH mapping population (169 lines). The main effect QTL are highlighted in bold. e, environment; T1, trial 1; T2, trial 2; T3, trial 3; T4, trial 4; T, Tumida; V, Varuna; *Bih*, branch initiation height; *Df*, days to flower; *Pbr*, number of primary branches; *Plht*, plant height; *Dia*, stem diameter; *Bf*, bend force; *Sf*, stab force; *Pf*, press force; *Bs*, breaking strength

**Table S10** Stable QTL for plant architectural traits in the TUV population. The major QTL ( $R^2 \geq 10\%$ ) are highlighted in bold. T, Tumida; V, Varuna; SE, single environment; T1, trial 1; T2, trial 2; T3, trial 3; T4, trial 4

**Table S11** List of genes harbored in the Stable QTL regions (< 2.5Mb) for plant architectural traits in the TUV population according to the Tumida and Varuna genome assemblies

**Table S12** Candidate genes in the Stable QTL intervals (< 2.5Mb) for plant architectural traits in the TUV population

**Table S13** Mean ( $n = 10$ ) trait values of the stem strength measures of some *B. juncea* cultivars calculated using the phenotypic data obtained in the field trial conducted in 2019-20 (T2)
